# Supplementary material for: MicroRNA-874-3p promotes testosterone-induced granulosa cell apoptosis by suppressing HDAC1-mediated p53 deacetylation
Source: PubMed Central journal article supplement — Exp Ther Med. 2021 Feb 13;21(4):359. doi: 10.3892/etm.2021.9790 (PMC7903439; doi:10.3892/etm.2021.9790), 2021-02-13

Figure S1. Cell apoptosis is increased in granulosa cells isolated from patients with PCOS. Cell apoptosis in (A) patients without PCOS and (B) patients with PCOS was determined via flow cytometry and (C) quantified. \* $P < 0.05$  vs. non-PCOS. PCOS, polycystic ovary syndrome.

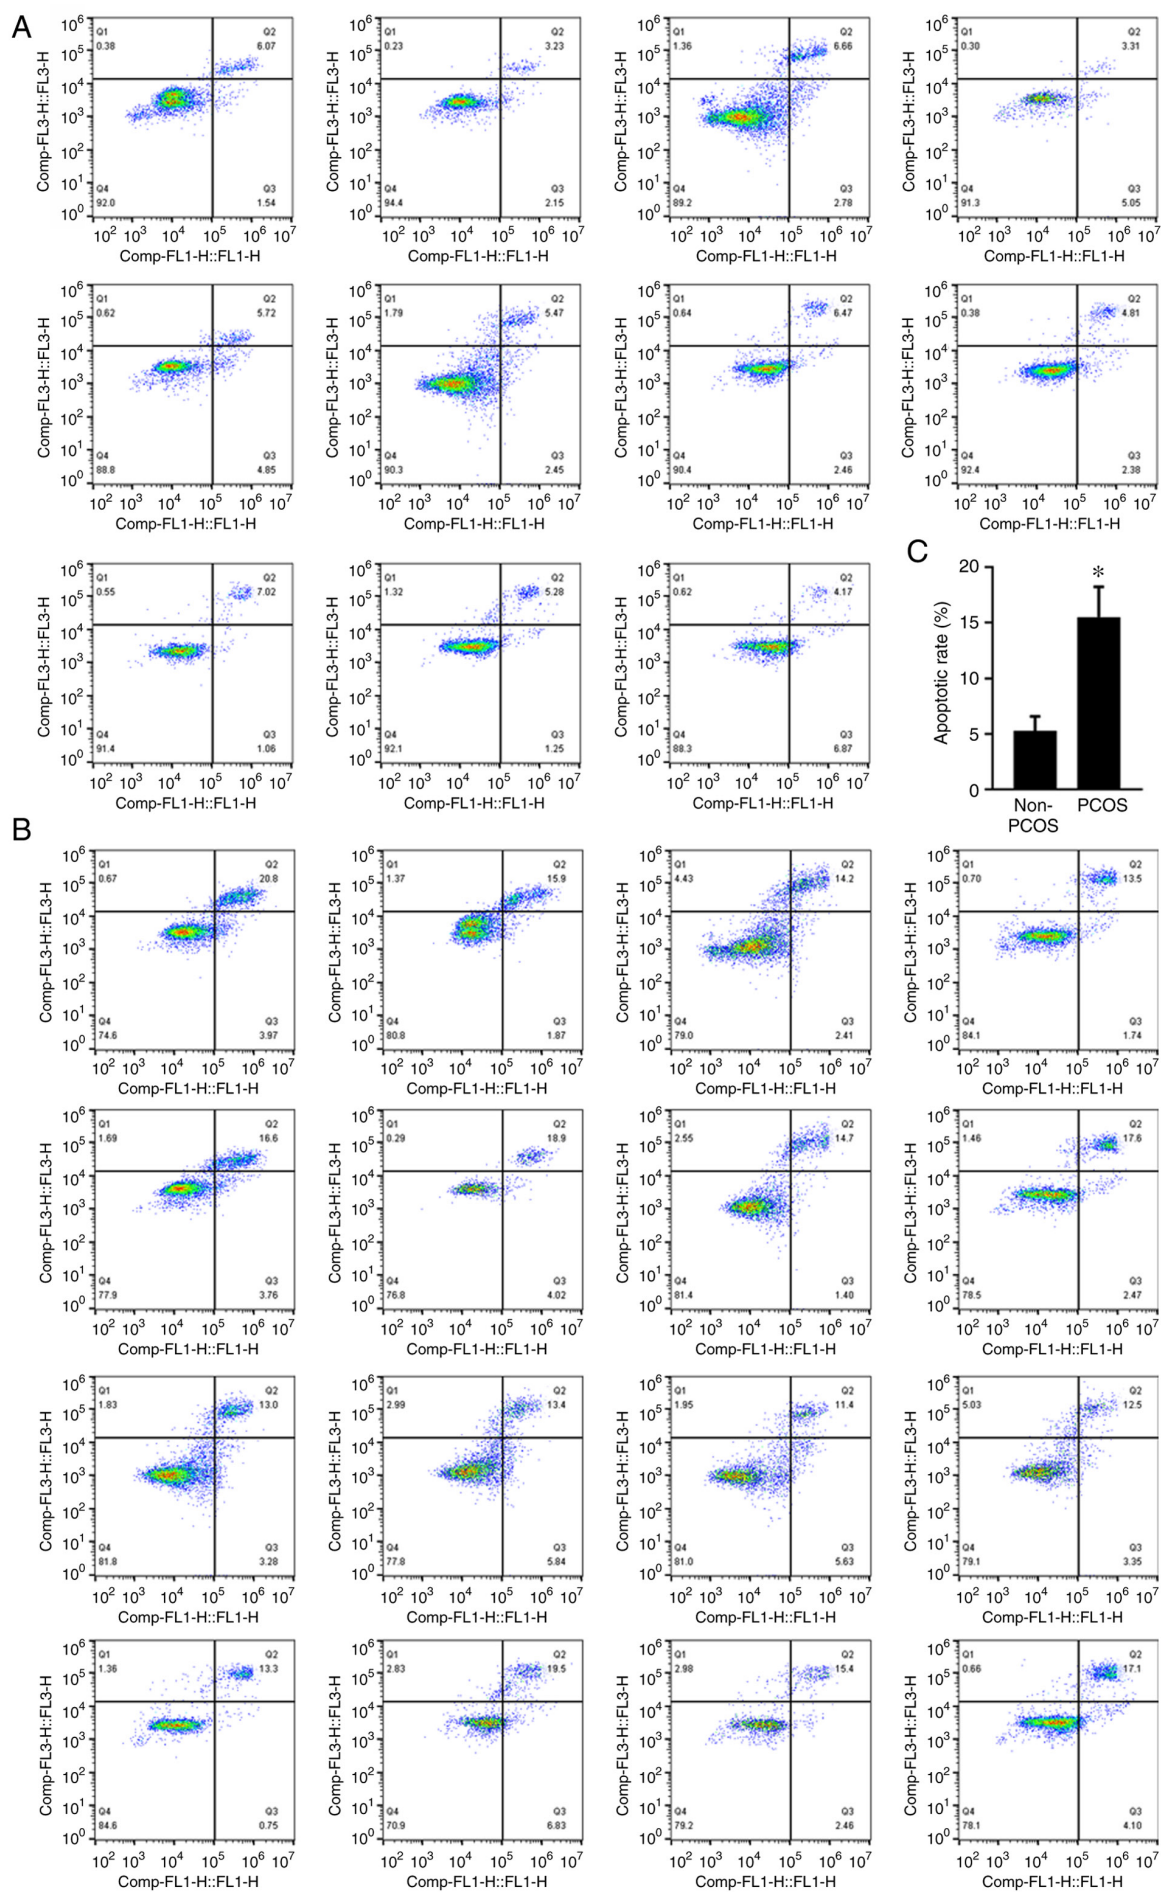

Supplement: Supplementary_Data.pdf [file Supplementary_Data.pdf]
